# Supplementary material
Source: MDPI journal article supplement (https://www.mdpi.com/2071-1050/14/11/6919)
Supplement: s1 [file s1]

## Geotechnology Applied to Analysis of Vegetation Dynamics and Occurrence of Forest Fires on Indigenous Lands in Cerrado-Amazonia Ecotone

Felipe Gimenes Silva, Alexandre Rosa dos Santos, Nilton Cesar Fiedler, Juarez Benigno Paes, Plinio Antonio Guerra Filho, Rosane Gomes da Silva, Marks Melo Moura, Evandro Ferreira da Silva, Saira G. de Oliveira Santos Rodrigues Silva, Raphael Maia Aveiro Cessa, Washington Amaral Ferreira, Fabio Gonçalves Marinho

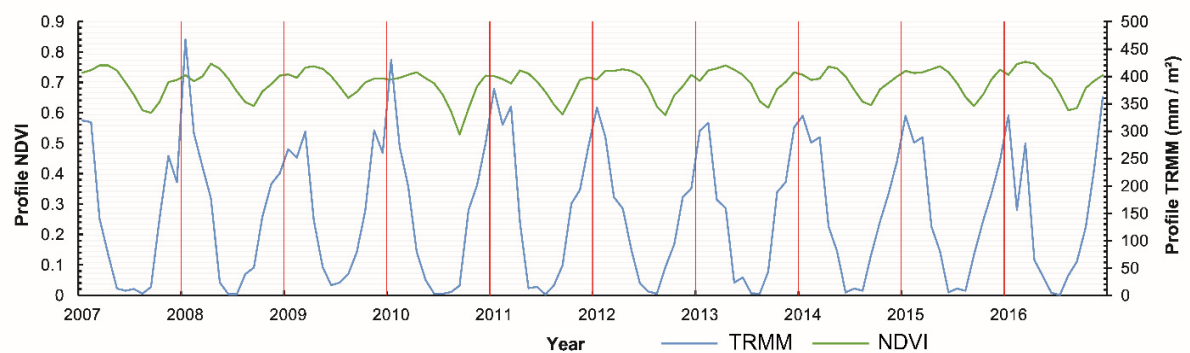

**Figure S1.** NDVI temporal profile (green) with rainfall (blue) in the study area, representing the studied period (2007 to 2016).

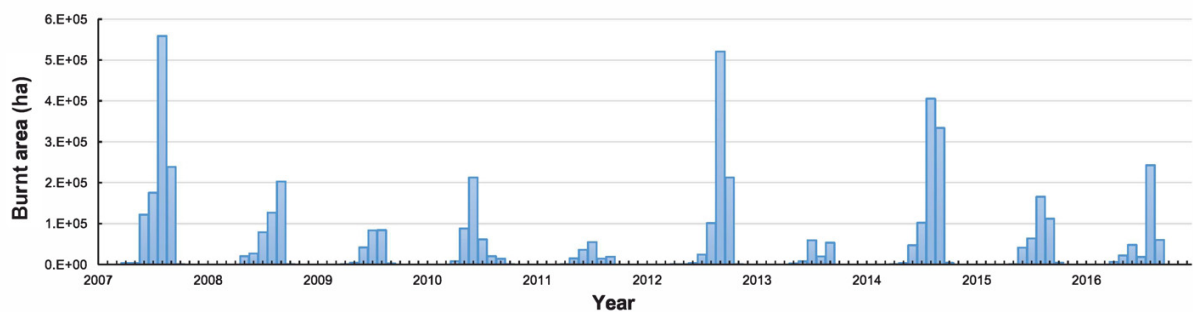

**Figure S2.** Temporal profile of Burnt Area in Cerrado-Amazonia Ecotone represented by the amount of burnt area throughout the entire studied period (2007 to 2016).

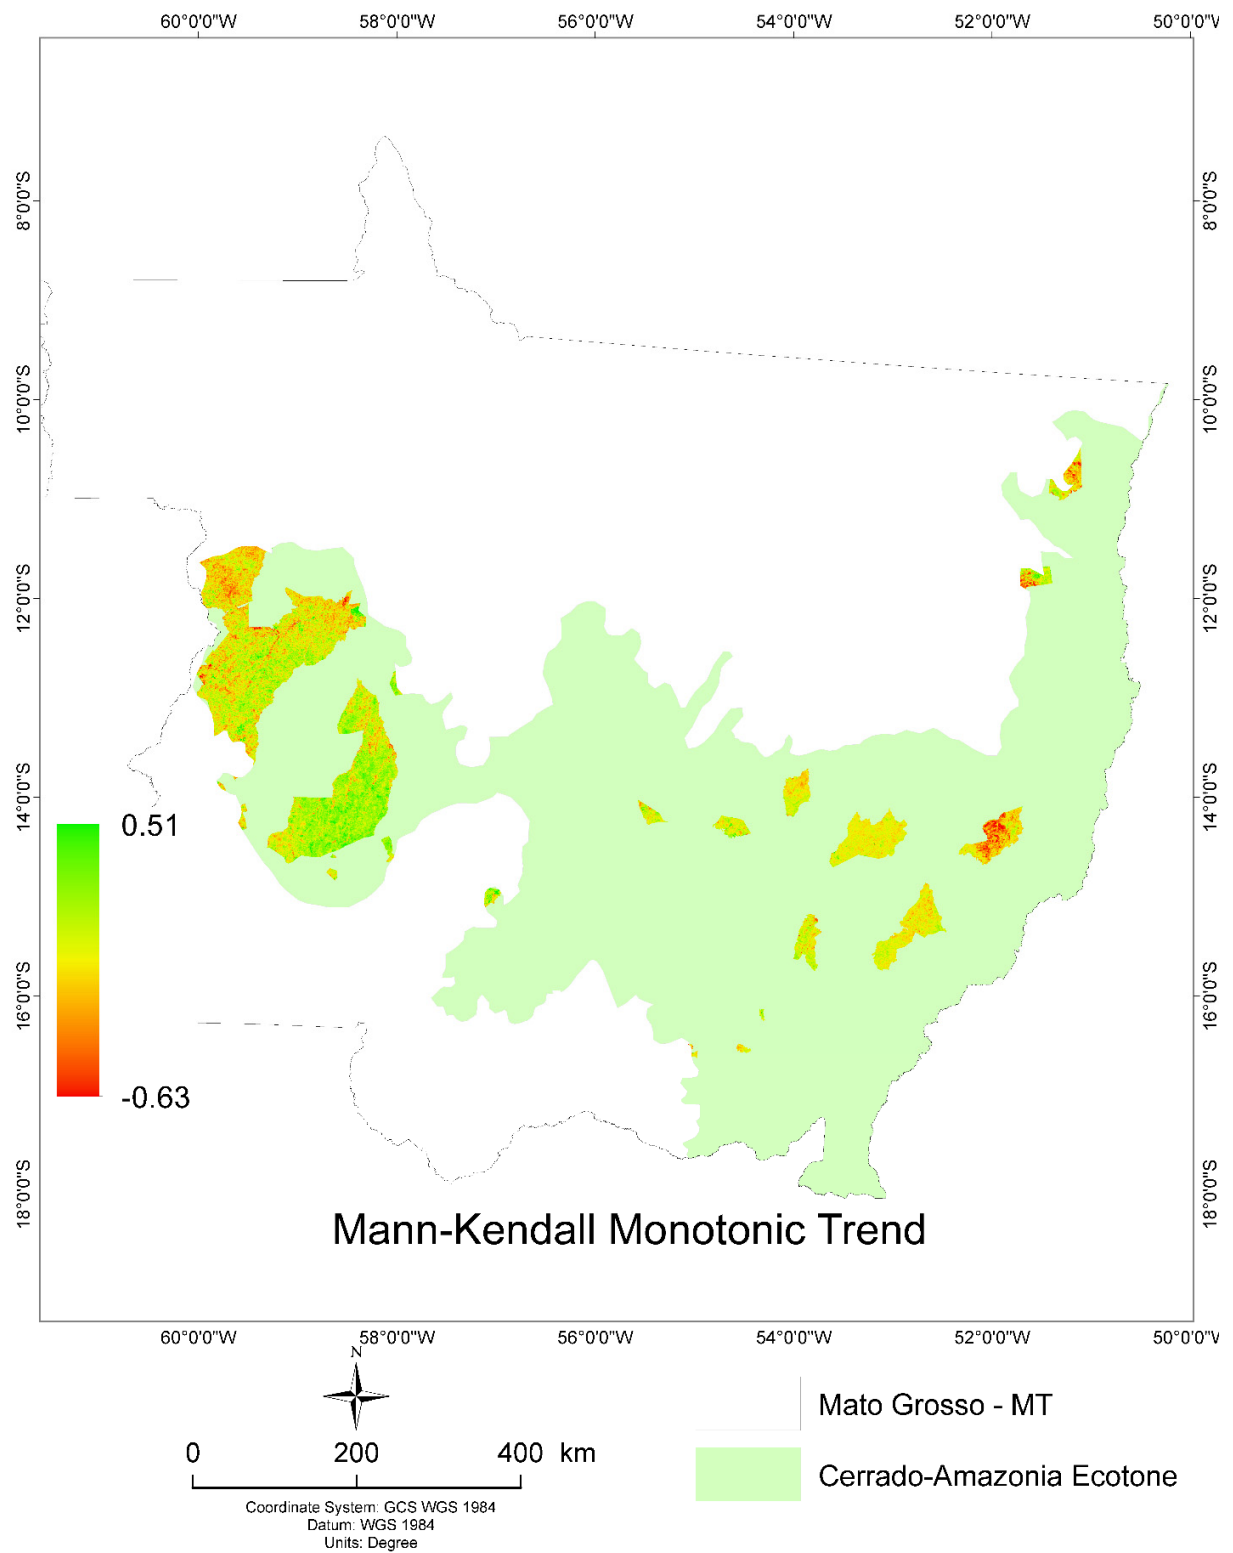

**Figure S3.** Mann-Kendall Monotonic Trend.

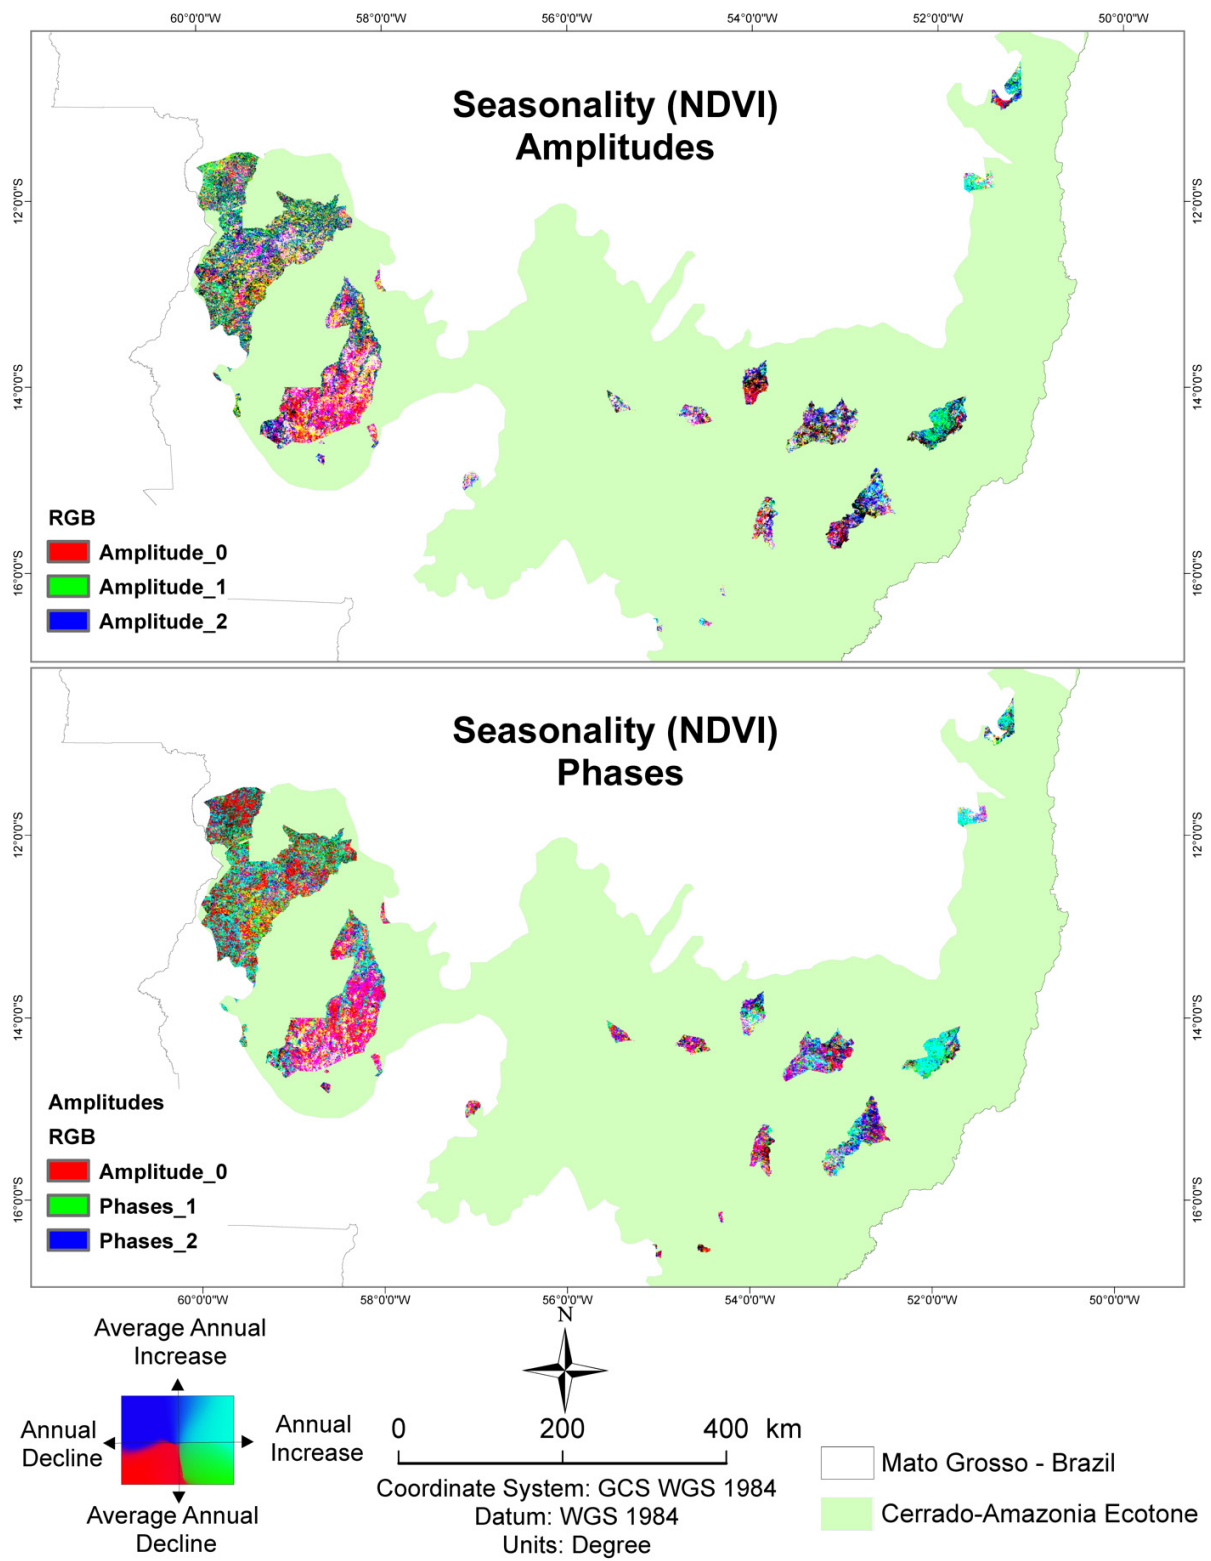

**Figure S4.** Seasonal trend analysis for NDVI.
